# Supplementary material for: Increased CFTR expression and function from an optimized lentiviral vector for cystic fibrosis gene therapy
Source: PubMed Central journal article supplement — Mol Ther Methods Clin Dev. 2021 Feb 27;21:94–106. doi: 10.1016/j.omtm.2021.02.020 (PMC7973238; doi:10.1016/j.omtm.2021.02.020), 2021-02-27
Supplement: mmc1.pdf [file mmc1.pdf]

**OMTM, Volume 21**

**Supplemental information**

**Increased CFTR expression and function  
from an optimized lentiviral vector  
for cystic fibrosis gene therapy**

**Laura I. Marquez Loza, Ashley L. Cooney, Qian Dong, Christoph O. Randak, Stefano Rivella, Patrick L. Sinn, and Paul B. McCray Jr.**

## Supplemental Methods

### Immunohistochemistry

Epithelia were fixed overnight in 4% paraformaldehyde at 4°C. SuperBlock (Thermo Fischer Scientific/Gibco, Waltham, MA) with 0.2% Triton X-100 was used to block. Epithelia were incubated with an acetylated  $\alpha$ -tubulin antibody diluted 1:200 (Cell Signal D20G3 K40, Danvers, MA), before incubating with the secondary antibody Alexa Fluor 568 diluted 1:600 (Invitrogen A11036, Carlsbad, CA). A conjugated phalloidin Alexa Fluor 647 (Invitrogen A22287, Carlsbad, CA) was then used at 1:100 dilution. All incubation steps were done at room temperature for 1 hour, and 3 washes for 10 minutes with TBST were performed between each step. Finally, epithelia were mounted on microscope slides in VECTASHIELD with DAPI (Vector Laboratories, Burlingame, CA).

## Supplemental Figures

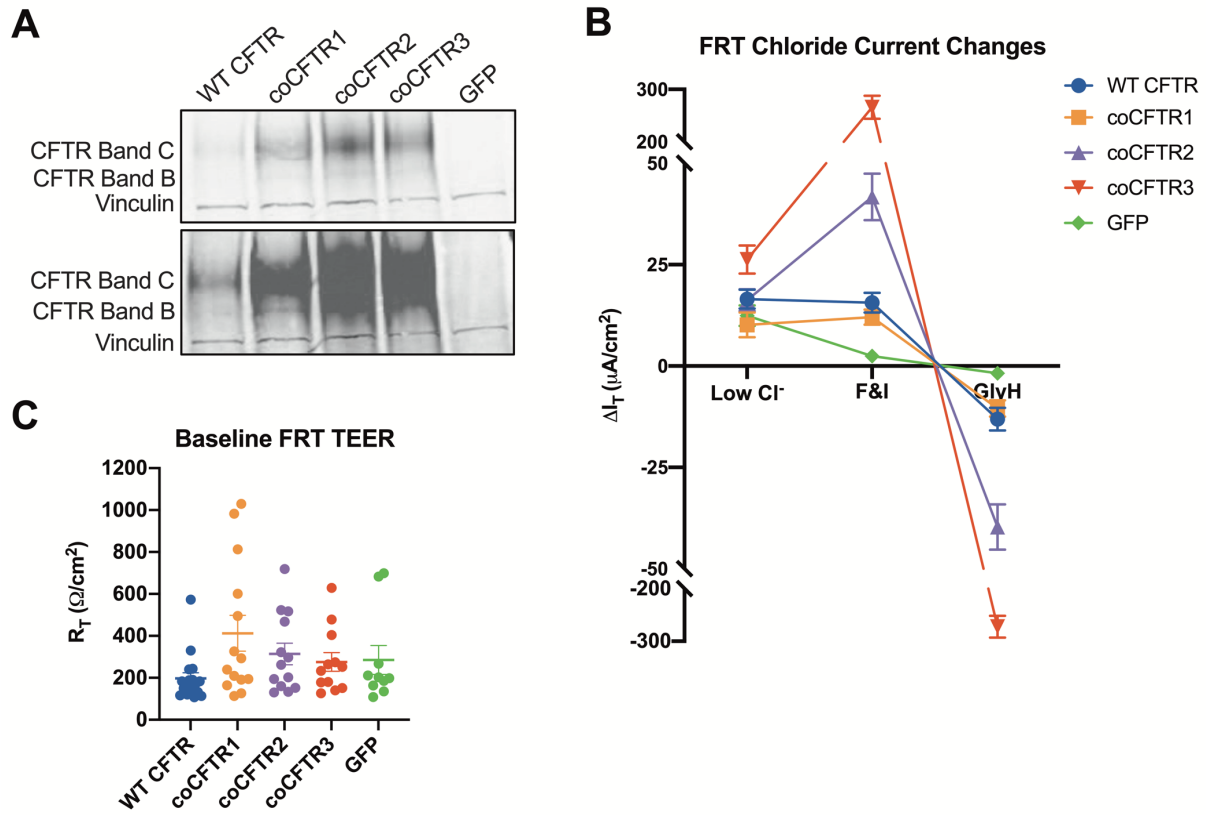

**Figure S1. Codon optimized *CFTR* sequences increase protein production and generate unique changes in transepithelial chloride current in Fischer rat thyroid cells.** Fischer rat thyroid (FRT) cells were transfected with pcDNA3.1(+) plasmids expressing wildtype (WT) *CFTR*, codon optimized (co) *coCFTR1*, *coCFTR2*, *coCFTR3*, or a GFP control. (A) Three days post transfection, cell lysate was collected and *CFTR* was quantified by western blot. The same representative blot is shown with normal exposure (top) and with overexposure of the *CFTR* channel (bottom) to visualize WT *CFTR*. Similarly, FRT cells were electroporated with the same plasmids, seeded on semipermeable membranes and allowed to form an epithelial layer under air-liquid interface culture conditions. (B) Epithelia were mounted in Ussing chambers and changes in transepithelial Cl<sup>-</sup> current ( $\Delta I_T$ ) in response to an apical low Cl<sup>-</sup> gradient, *CFTR* activation by forskolin and 3-isobutyl-1-methylxanthine (F&I), and *CFTR* inhibition by GlyH were calculated. (C) The baseline transepithelial electrical resistance (TEER) was quantified. No significant differences in TEER were observed between any of the treatment groups. Mean  $\pm$  SE are shown.

Figure S2

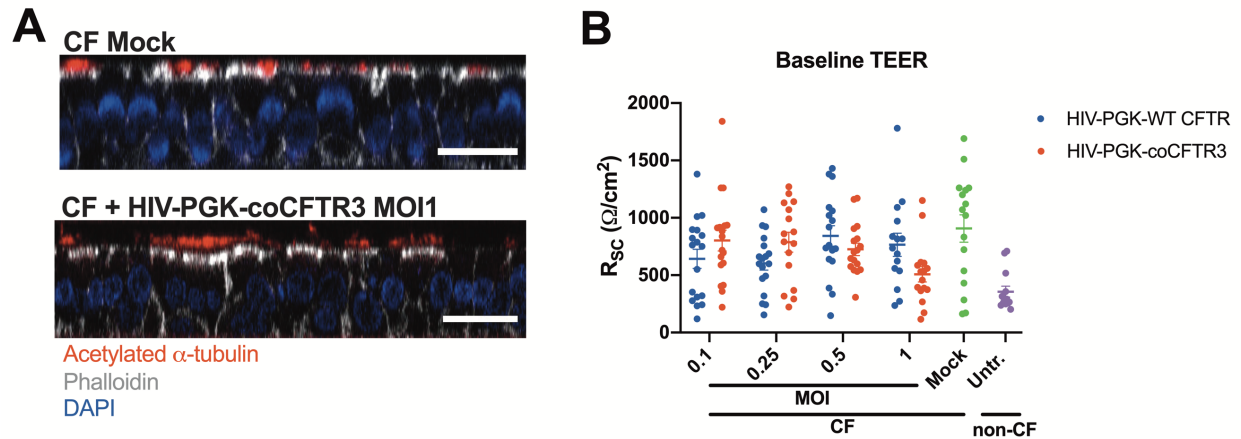

**Figure S2. Formation of a differentiated epithelium is not affected by exogenous CFTR expression from a lentiviral vector.** CF basal cells were transduced with HIV-PGK-WT CFTR or HIV-PGK-coCFTR3 at MOI 0.1, 0.25, 0.5 or 1 at the time of seeding on semipermeable membranes. (A) After four weeks of differentiation under air-liquid interface culture conditions, pseudostratified ciliated columnar epithelia were observed. Scale bars represent 20  $\mu$ m. (B) The baseline transepithelial electrical resistance (TEER) of epithelia studied in Ussing chambers was quantified and no significant differences were observed between any of the treatment groups. Mean  $\pm$  SE are shown.
